# Supplementary material for: Exosomes from antigen-pulsed dendritic cells induce stronger antigen-specific immune responses than microvesicles in vivo
Source: PubMed Central journal article supplement (PMC5719080; doi:10.1038/s41598-017-16609-6), 2017-12-06
Supplement: 41598_2017_16609_MOESM1_ESM.pdf [file 41598_2017_16609_MOESM1_ESM.pdf]

# Supplementary Information

## **Exosomes from antigen-pulsed dendritic cells induce stronger antigen-specific immune responses than microvesicles *in vivo***

Casper J.E. Wahlund, Gözde Güclüler, Stefanie Hiltbrunner, Rosanne E. Veerman, Tanja I. Näslund,

Susanne Gabrielsson\*

# Supplementary Figure S1

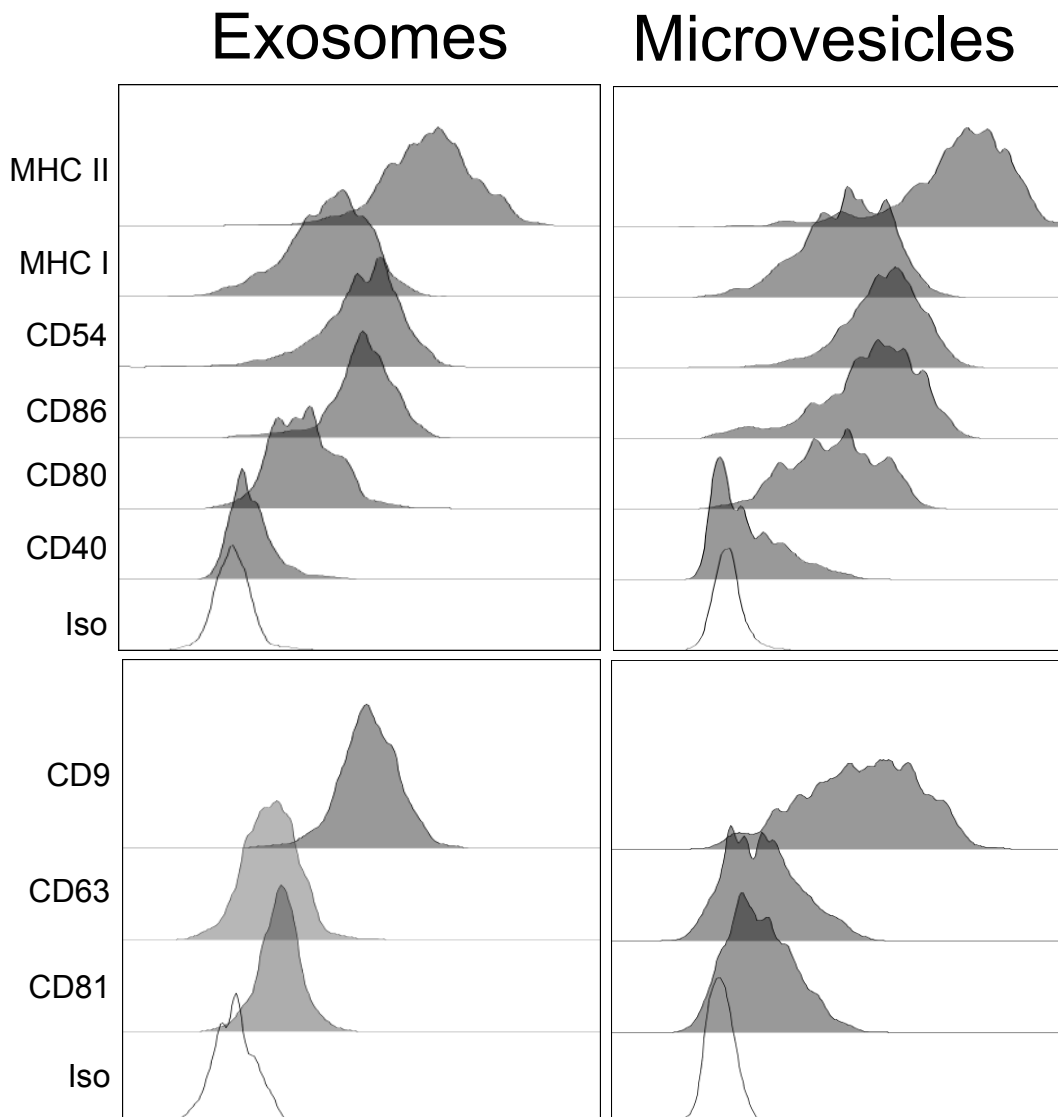

## Supplementary figure S1

Exosomes or microvesicles from OVA-pulsed bone marrow-derived dendritic cells were bound to anti-MHC class II beads, stained for surface markers and acquired in a flow cytometer.

## Supplementary figure S2

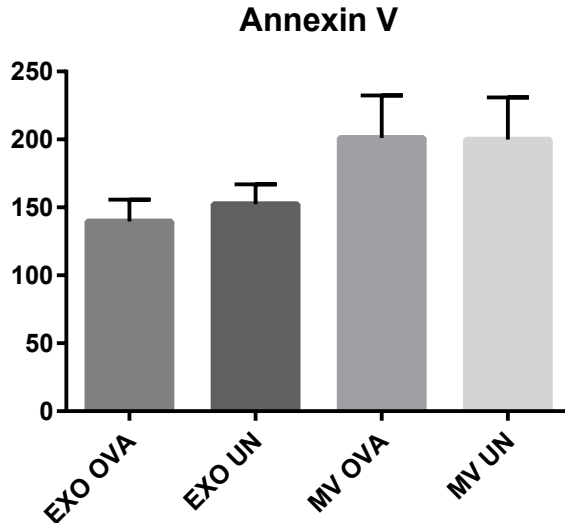

### Supplementary Figure S2

Surface-oriented amounts of phosphatidylserine on exosomes (Exo) and microvesicles (MV) from OVA-pulsed (or UN-pulsed) bone marrow-derived dendritic cells. Vesicles were bound to anti-MHC class II coated beads and stained for Annexin V binding and acquired by a flow cytometer.

# Supplementary figure S3

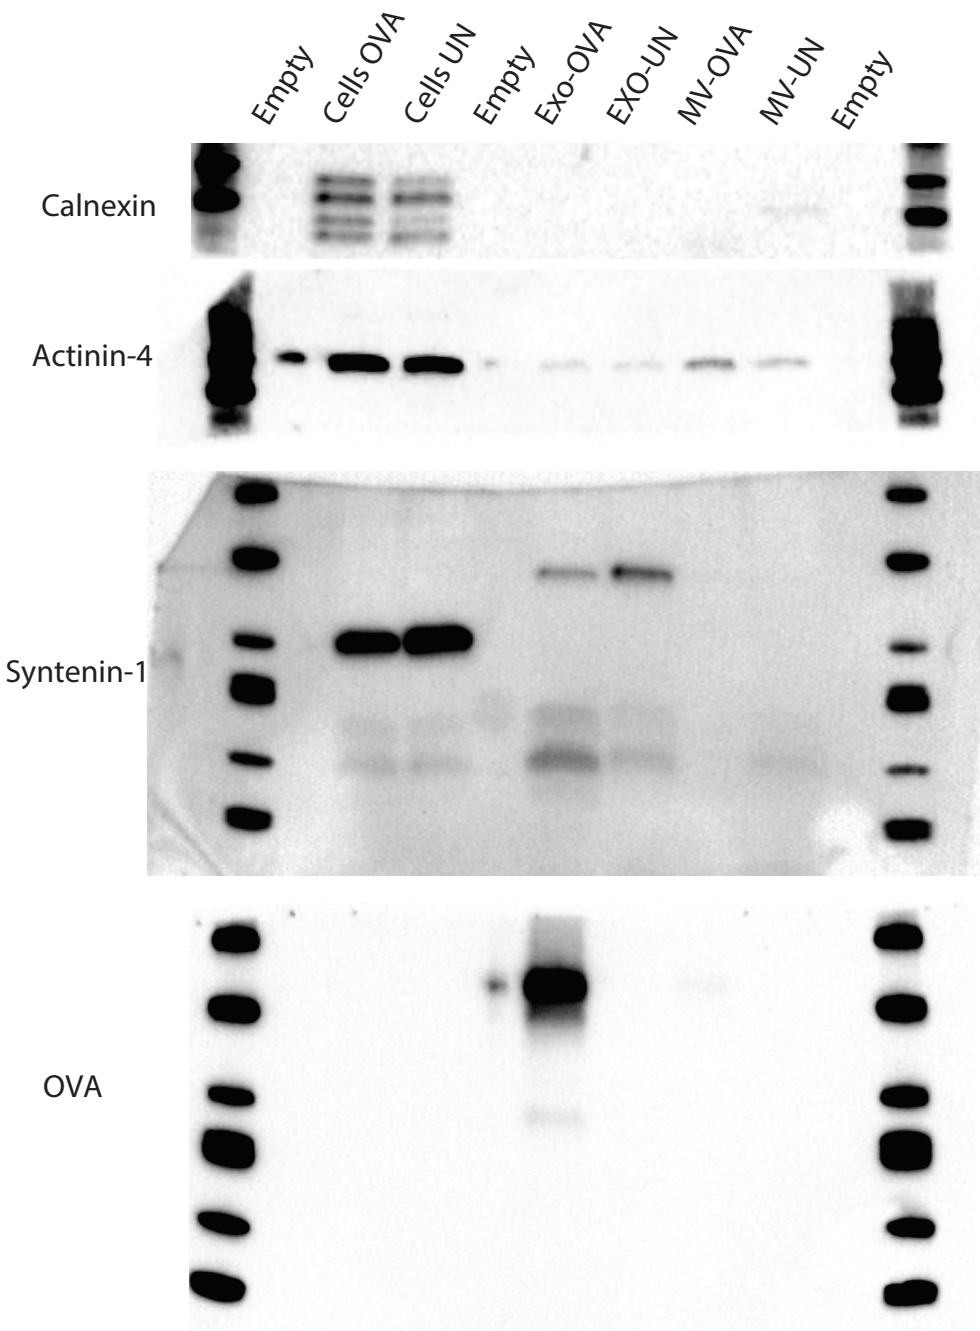

Supplementary Figure S3

Expanded non-cropped gel images from the Western Blot depicted in article figure 7a.
